# Supplementary material for: A Porcine Ex Vivo Lung Perfusion Model To Investigate Bacterial Pathogenesis
Source: PubMed Central journal article supplement (PMC6890995; doi:10.1128/mbio.02802-19), 2019-12-03

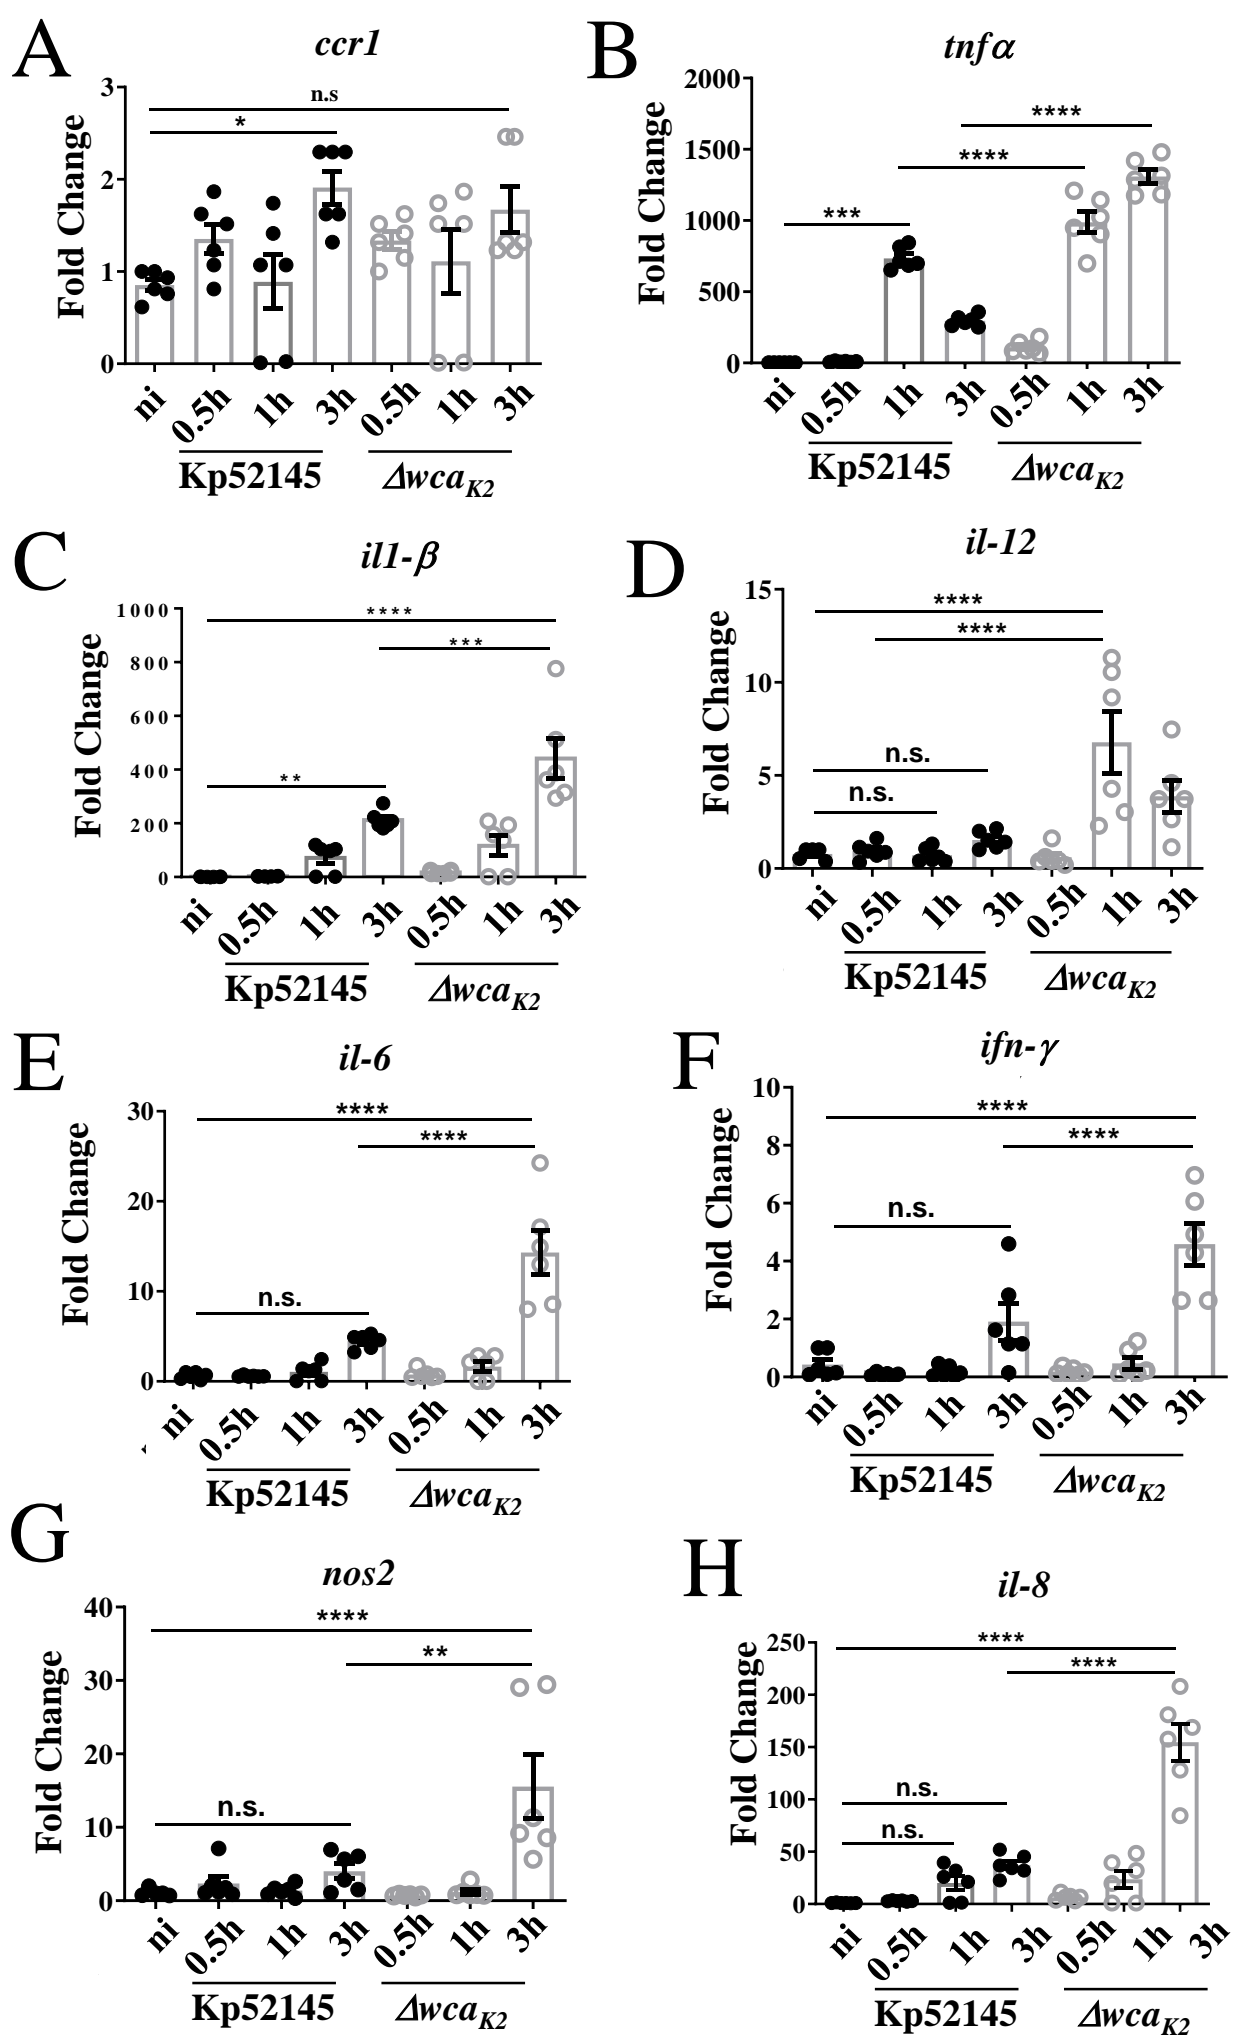

Supplement: mBio.02802-19-sf003.pdf [file mBio.02802-19-sf003.pdf]
